# Supplementary material
Source: PubMed Central journal article supplement (PMC1271747)
Supplement: 7600037s1.pdf [file 7600037s1.pdf]

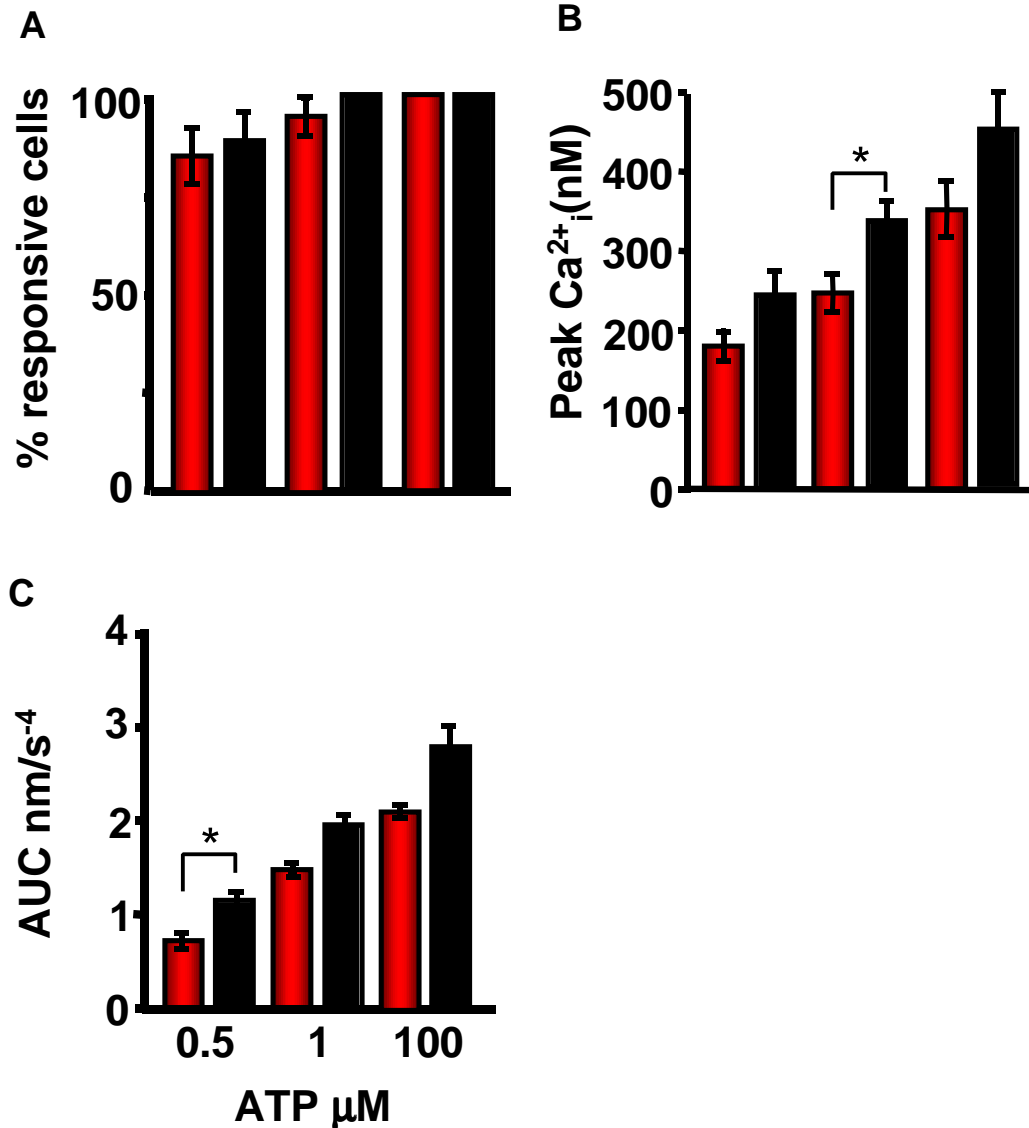

**Supplementary figure 1. Calbindin buffers agonist induced  $\text{Ca}^{2+}$  responses without decreasing the percentage of responsive cells.**  $\text{Ca}^{2+}$  release following stimulation with 0.5, 1 and 100  $\mu\text{M}$  ATP was compared between control cell (black bars,  $n=40$ ) and calbindin transfected cells (red bars,  $n=47$ ). Calbindin transfected cells were identified by co-transfection with a YFP expression vector at a 5:1 molar ratio. A, the percentage of cells responding to each agonist concentration. B, The peak amplitude of the  $\text{Ca}^{2+}$  response. C, The integrated  $\text{Ca}^{2+}$  response (AUC) of calcium release. These data show that although calbindin decreases the amplitude and integrated  $\text{Ca}^{2+}$  signal, consistent with a simple  $\text{Ca}^{2+}$  buffer, unlike CaBP it does not decrease the percentage of responsive cells. Statistical significance is indicated by \* and is accepted at  $p < 0.05$ .
