# Supplementary material
Source: PubMed Central journal article supplement (PMC1271747)
Supplement: 7600037s3.pdf [file 7600037s3.pdf]

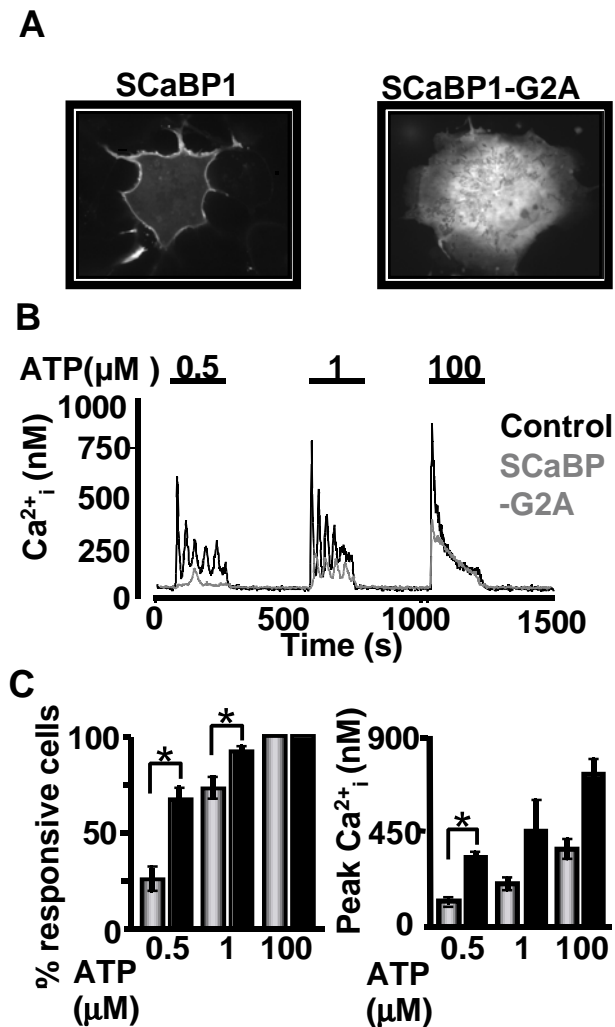

**Supplementary figure 3. Myristoylation of CaBP1 is responsible for its membrane localisation.** A, Mutation of the second glycine in SCaBP1 that forms part of a consensus site for myristoylation results in loss of membrane targeting as visualised by YFP fluorescence. SCaBP1-YFP is predominantly targeted to cellular membranes whereas SCaBP1-G2A-YFP is diffusely distributed throughout the cytoplasm. 48 hrs post transfection cells were imaged by confocal microscopy as described in the Materials and Methods. B, ATP induced Ca<sup>2+</sup> responses from SCaBP1-G2A (grey trace) and controls (black trace). C, The percentage of responding cells and the peak amplitude of Ca<sup>2+</sup> responses at the indicated agonist concentration. The grey bars denote the response of SCaBP1-G2A transfected cells and black bars the controls. Statistical significance is indicated by \*.
